# Supplementary material for: Provisional focal stenting of complex femoropopliteal lesions using the Multi-LOC multiple stent delivery system – 12-month results from the LOCOMOTIVE EXTENDED study
Source: Atypon-hosted journal article supplement (doi:10.1024/0301-1526/a000927), 2020-11-26
Supplement: 0301-1526_a000927_esm1.pdf [file 0301-1526_a000927_esm1.pdf]

**ESM 1.** Kaplan-Meier Curve for freedom from clinically-driven target lesion revascularization

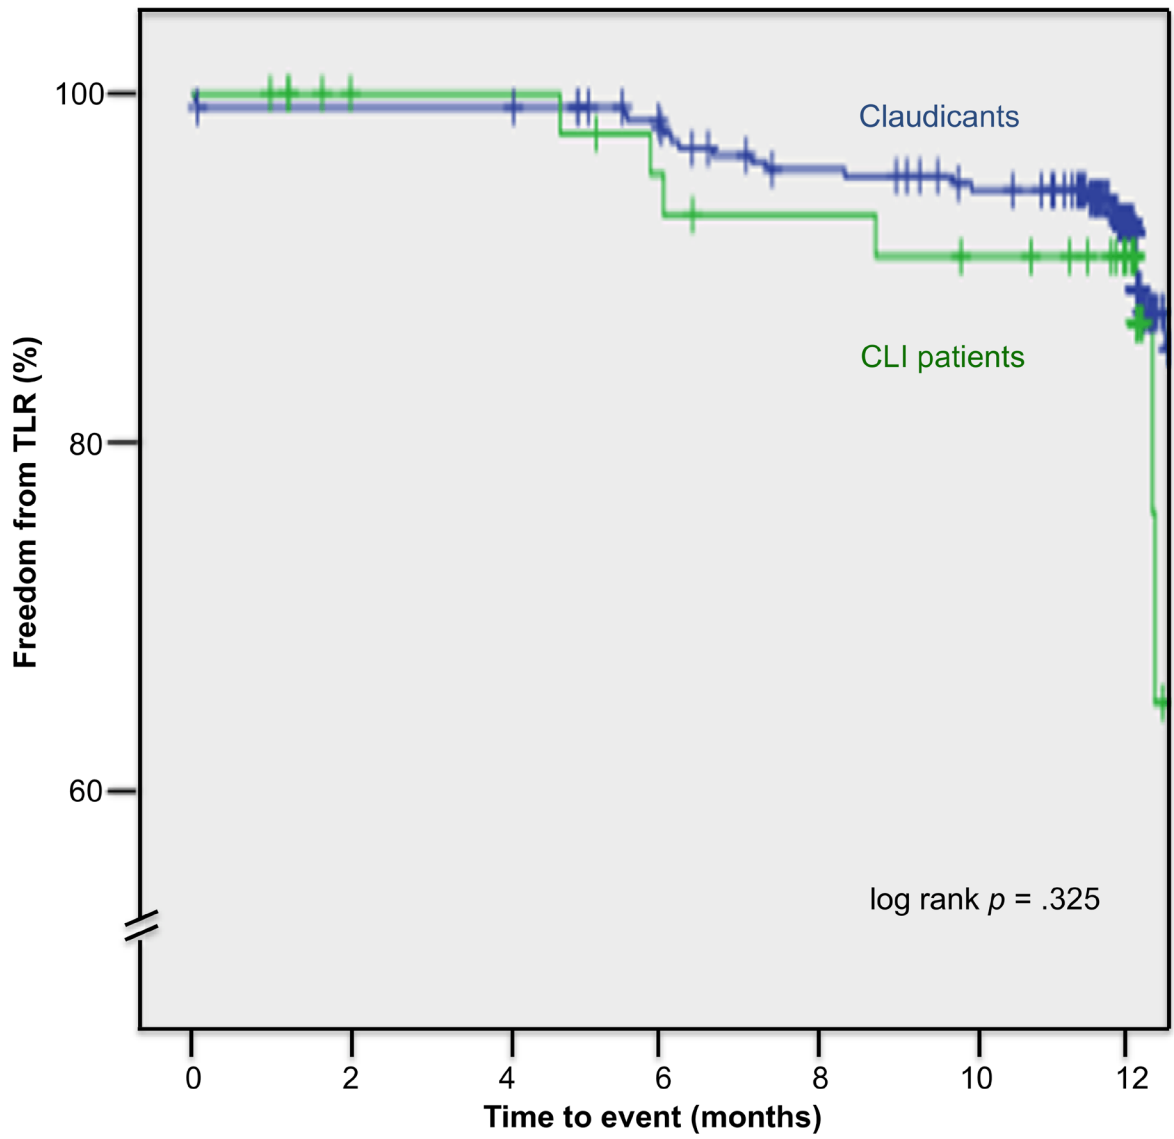

No. at risk

|              |     |     |     |     |     |     |     |
|--------------|-----|-----|-----|-----|-----|-----|-----|
| Claudicants  | 297 | 259 | 258 | 256 | 239 | 231 | 184 |
| CLI patients | 60  | 44  | 43  | 40  | 38  | 36  | 31  |
