# Supplementary material for: Provisional focal stenting of complex femoropopliteal lesions using the Multi-LOC multiple stent delivery system – 12-month results from the LOCOMOTIVE EXTENDED study
Source: Atypon-hosted journal article supplement (doi:10.1024/0301-1526/a000927), 2020-11-26
Supplement: 0301-1526_a000927_esm2.pdf [file 0301-1526_a000927_esm2.pdf]

**ESM 2.** Clinical outcomes at 12 months – additional data

|                                                        | <b>All patients</b> | <b>Critical limb ischaemia</b> | <b>No critical limb ischaemia</b> | <b>p-value</b> |
|--------------------------------------------------------|---------------------|--------------------------------|-----------------------------------|----------------|
| Patients                                               | 357                 | 60                             | 297                               |                |
| <i>Rutherford category</i>                             |                     |                                |                                   |                |
| 0                                                      | 115 (37.0)          | 16 (32.7)                      | 99 (37.8)                         | <0.001         |
| 1                                                      | 89 (28.6)           | 8 (16.3)                       | 81 (30.9)                         |                |
| 2                                                      | 36 (11.6)           | 2 (4.1)                        | 34 (13.0)                         |                |
| 3                                                      | 18 (5.8)            | 1 (2.0)                        | 17 (6.5)                          |                |
| 4                                                      | 10 (3.2)            | 4 (8.2)                        | 6 (2.3)                           |                |
| 5                                                      | 4 (1.3)             | 3 (6.1)                        | 1 (0.4)                           |                |
| 6                                                      | 2 (0.6)             | 2 (4.1)                        | 0 (0.0)                           |                |
| Unknown or impacted*                                   | 37 (11.9)           | 13 (26.5)                      | 24 (9.2)                          |                |
| TVR (recurrent PTA, lysis)                             | 43 (13.8)           | 9 (18.4)                       | 34 (13.0)                         | 0.316          |
| Non-target vessel revascularisation                    | 23 (7.4)            | 7 (14.3)                       | 16 (6.1)                          | 0.045          |
| Major amputations, target and non-target leg           | 8 (2.6)             | 5 (10.2)                       | 3 (1.1)                           | <0.001         |
| Follow-ups relative to mortality**                     | 313 (87.7)          | 50 (83.3)                      | 263 (88.6)                        | 0.262          |
| Follow-up duration – months (including time to event)  | 11.4 ± 3.3          | 10.1 ± 4.3                     | 11.7 ± 3.0                        | 0.001          |
| All thrombotic events including peri-procedural events | 17 (5.5)            | 3 (6.1)                        | 14 (5.3)                          | 0.826          |
| <i>Death</i>                                           |                     |                                |                                   |                |
| Not related to intervention                            | 17 (5.5)            | 6 (12.2)                       | 11 (4.2)                          | <0.001         |
| Possibly related to Intervention                       | 2 (0.6)             | 1 (2.0)                        | 1 (0.4)                           |                |
| Cardiac death                                          | 3 (1.0)             | 3 (6.1)                        | 0 (0.0)                           |                |

Data are n (%) or mean  $\pm$  standard deviation. For continuous variables p-values are from unpaired student t-test and chi square for categorical variables. TVR = target vessel revascularization; PTA = Percutaneous transluminal angioplasty.

\*presence of claudication due to contralateral leg, non-vascular factors or amputations

\*\*follow-ups by telephone
