# Supplementary material for: Provisional focal stenting of complex femoropopliteal lesions using the Multi-LOC multiple stent delivery system – 12-month results from the LOCOMOTIVE EXTENDED study
Source: Atypon-hosted journal article supplement (doi:10.1024/0301-1526/a000927), 2020-11-26
Supplement: 0301-1526_a000927_esm3.pdf [file 0301-1526_a000927_esm3.pdf]

**ESM 3.** Impact of different variables (derived from the literature) on freedom from clinically-driven target lesion revascularisation in a logistic regression model

| <b>Variable</b>                        | <b>OR (95% CI)</b>    | <b>p-value</b> |
|----------------------------------------|-----------------------|----------------|
| Age – years                            | 0.990 (0.945 – 1.039) | 0.692          |
| Male gender                            | 1.981 (0.797 – 4.928) | 0.141          |
| Diabetes mellitus – yes/no             | 2.384 (0.954 – 5.958) | 0.063          |
| Hypertension – yes/no                  | 0.498 (0.128 – 1.929) | 0.313          |
| Hypercholesteremia – yes/no            | 0.995 (0.383 – 2.579) | 0.991          |
| Current smoking – yes/no               | 0.808 (0.461 – 1.414) | 0.455          |
| Critical limb ischaemia – yes/no       | 1.304 (0.358 – 4.745) | 0.687          |
| TASC II C/D lesion – yes/no            | 1.196 (0.435 – 3.286) | 0.729          |
| No distal run-off (no vessel) – yes/no | 2.733 (0.901 – 8.290) | 0.076          |
| Vessel diameter – mm                   | 1.027 (0.647 – 1.630) | 0.911          |
| Total lesion length – cm               | 0.998 (0.993 – 1.004) | 0.600          |
| Chronic total occlusion – yes/no       | 1.764 (0.705 – 4.417) | 0.225          |
| Predilation DCB – yes/no               | 0.468 (0.184 – 1.189) | 0.110          |

OR = odds ratio; CI = confidence interval.
